# Supplementary material for: Ethane dehydrogenation on pristine and AlOx decorated Pt stepped surfaces
Source: Royal Society of Chemistry journal article supplement (doi:10.1039/c8cy00398j), 2018-01-01
Supplement: c8cy00398j1.pdf [file c8cy00398j1.pdf]

Supplementary Information for:  
“Ethane Dehydrogenation on pristine and  $\text{AlO}_x$  decorated Pt stepped surfaces”

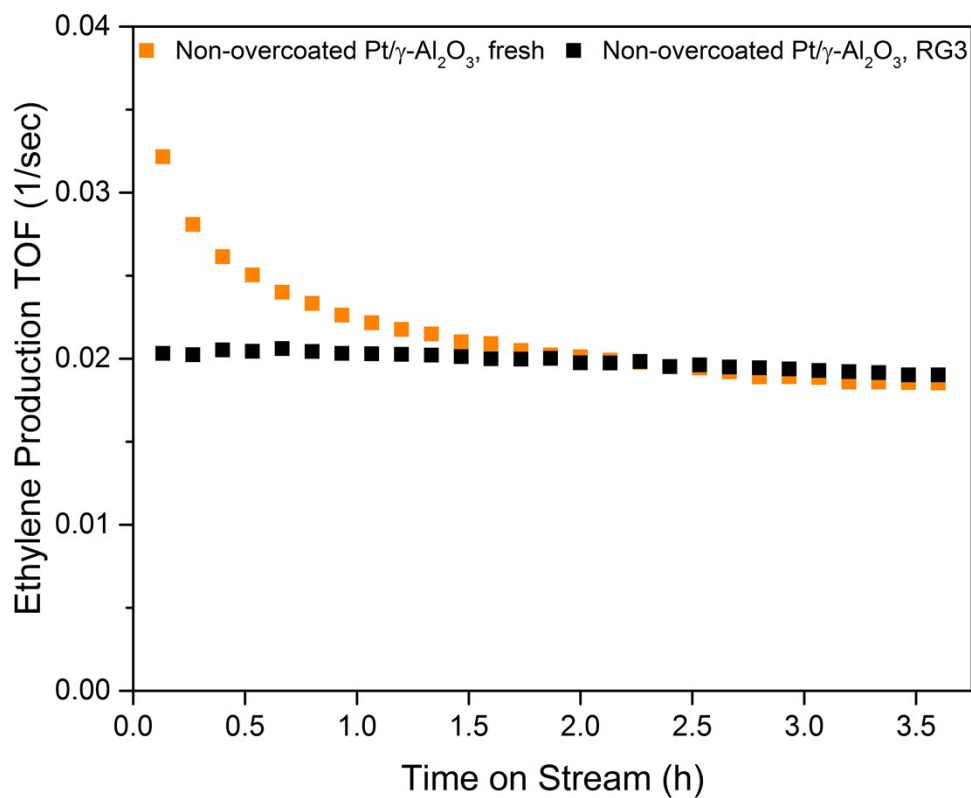

**Figure S1:** Ethylene production TOF versus time on stream on: fresh and RG3 (after three regenerations) non-overcoated Pt/ $\gamma$ - $\text{Al}_2\text{O}_3$  catalysts. Reaction conditions: 873 K, 12.5 Torr ethane, 0 Torr hydrogen and balance He for a total pressure of 1 atm.
